# Supplementary material
Source: PubMed Central journal article supplement (PMC1924931)

**The need for a multidisciplinary team approach to life science workflows**

**Timothy B. Patrick, PhD; Catherine K. Craven, MLS, MA; Lillian C. Folk, MS**

**Figure 1**  
 Three workflows for retrieval of gene function information

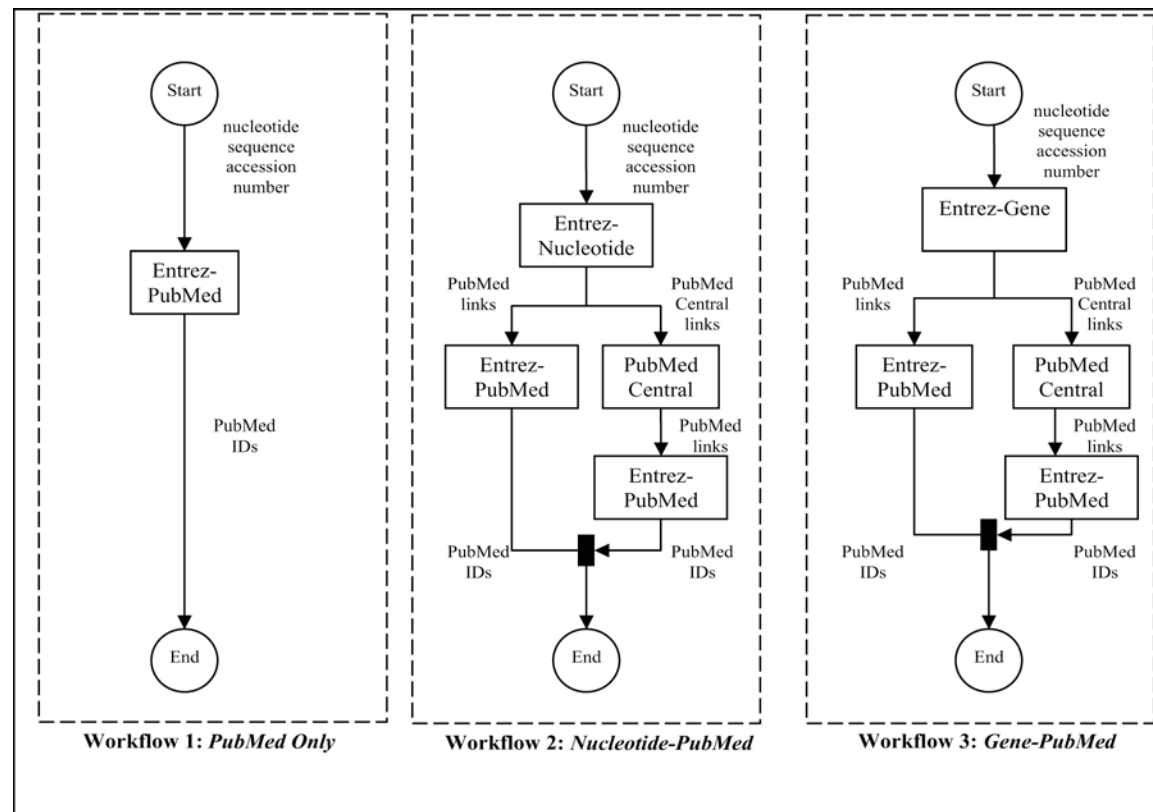

Supplement: jmla-095-03-0274-s1-f1.pdf [file jmla-095-03-0274-s1-f1.pdf]
