# Supplementary material
Source: PubMed Central journal article supplement (PMC1924931)

The need for a multidisciplinary team approach to life science workflows

Timothy B. Patrick, PhD; Catherine K. Craven, MLS, MA; Lillian C. Folk, MS

**Figure 2**  
 Nucleotide sequence accession numbers associated with one or more PubMed IDs

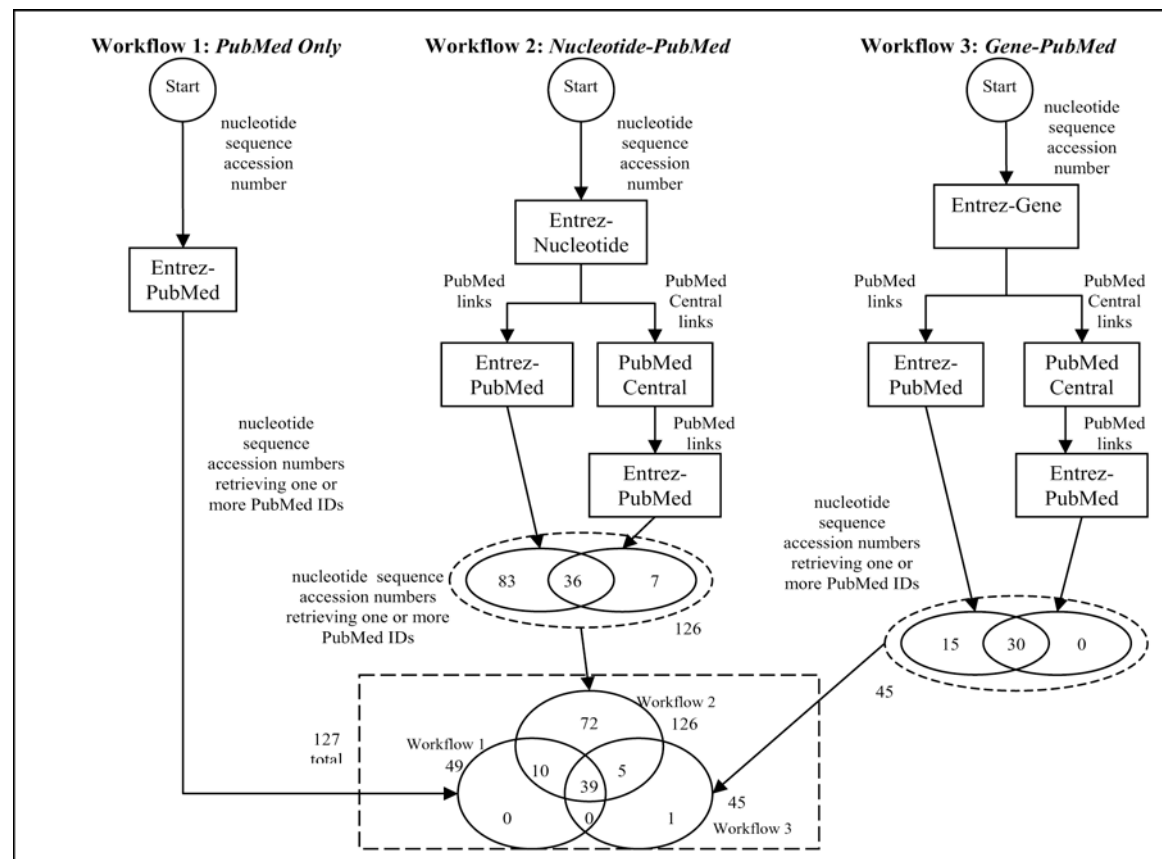

Supplement: jmla-095-03-0274-s1-f2.pdf [file jmla-095-03-0274-s1-f2.pdf]
