# Supplementary material
Source: PubMed Central journal article supplement (PMC1924931)

**The need for a multidisciplinary team approach to life science workflows**

**Timothy B. Patrick, PhD; Catherine K. Craven, MLS, MA; Lillian C. Folk, MS**

**Figure 3**  
 PubMed IDs retrieved

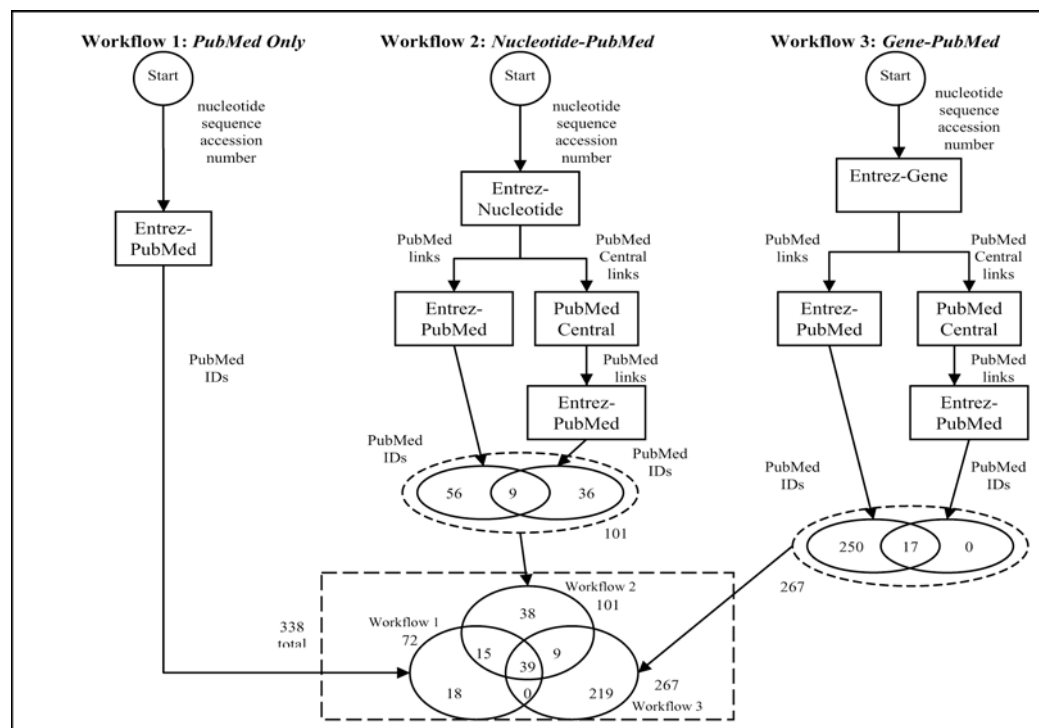

Supplement: jmla-095-03-0274-s1-f3.pdf [file jmla-095-03-0274-s1-f3.pdf]
